# Supplementary material for: Patient characteristics modify the association between changes in mineral metabolism parameters and mortality in a nationwide hemodialysis cohort study
Source: Springer Nature journal article supplement (doi:10.1038/s41598-025-92359-0), 2025-03-08
Supplement: MOESM1 [file 41598_2025_92359_MOESM1_ESM.pdf]

## Supplementary materials

### Contents:

**Figure S1.** Flow diagram. JRDR, the Japanese Society for Dialysis Therapy Renal Data Registry; HD, hemodialysis; HDF, hemodiafiltration; Ca, calcium; P, phosphate; PTH, parathyroid hormone.

**Figure S2:** Outline of the analysis for (A) difference changes in calcium and phosphate and (B) percent changes in parathyroid hormone. T0, a value at baseline; T1, a value at one year after baseline; T2, a value at two years after baseline; T3, a value at three years after baseline.

**Figure S3.** Relationship between changes in serum calcium (Ca) levels from baseline values and all-cause mortality.

**Figure S4.** Relationship between changes in serum phosphate (P) levels from baseline values and all-cause mortality.

**Figure S5.** Proportion of (A) all-cause death and (B) cardiovascular death in subgroups stratified by performance status (PS).

**Figure S6.** Relationship of time-averaged (TA) serum calcium or phosphate levels with mortality due to heart failure in patients stratified by performance status (PS).

**Figure S7.** Relationship between changes in serum phosphate levels and those in serum albumin levels in patients stratified by performance status (PS).

**Figure S8.** Relationship between percent changes in serum intact parathyroid hormone (PTH) levels from baseline values and all-cause mortality.

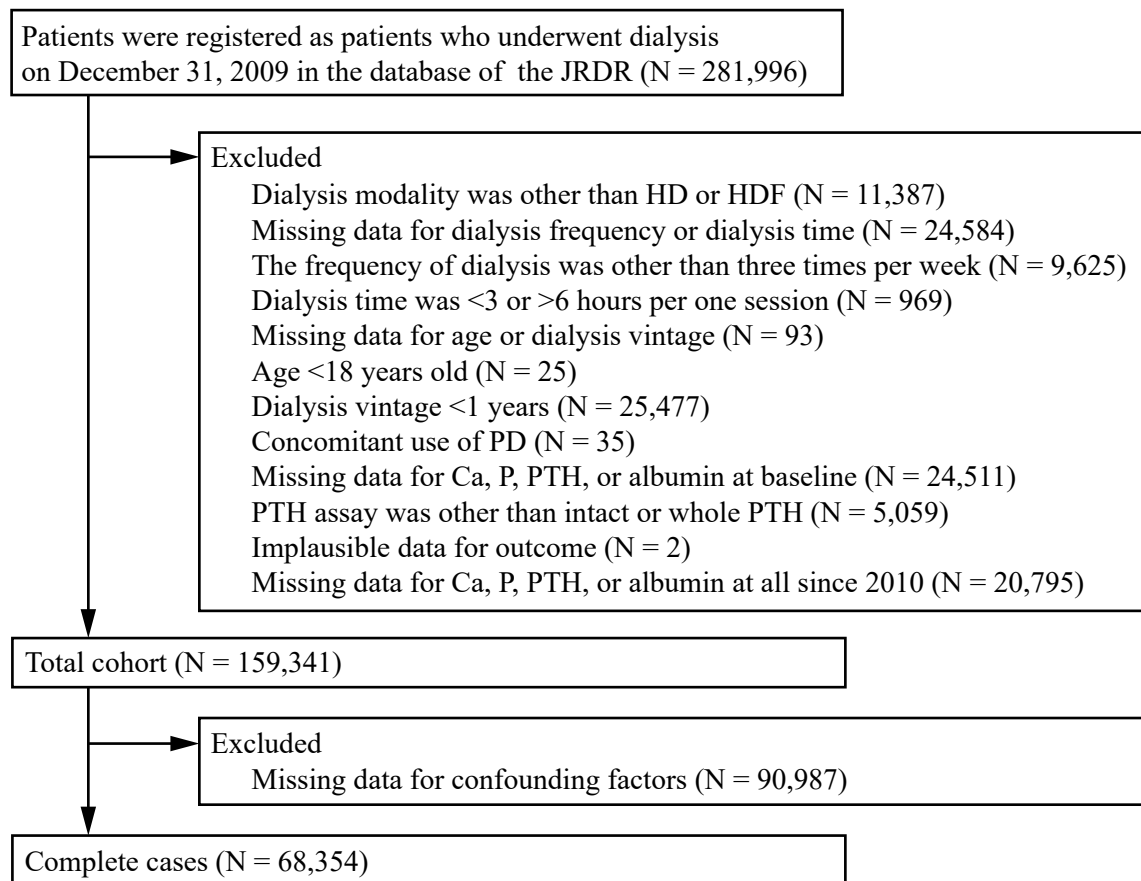

**Figure S1.** Flow diagram. JRDR, the Japanese Society for Dialysis Therapy Renal Data Registry; HD, hemodialysis; HDF, hemodiafiltration; Ca, calcium; P, phosphate; PTH, parathyroid hormone.

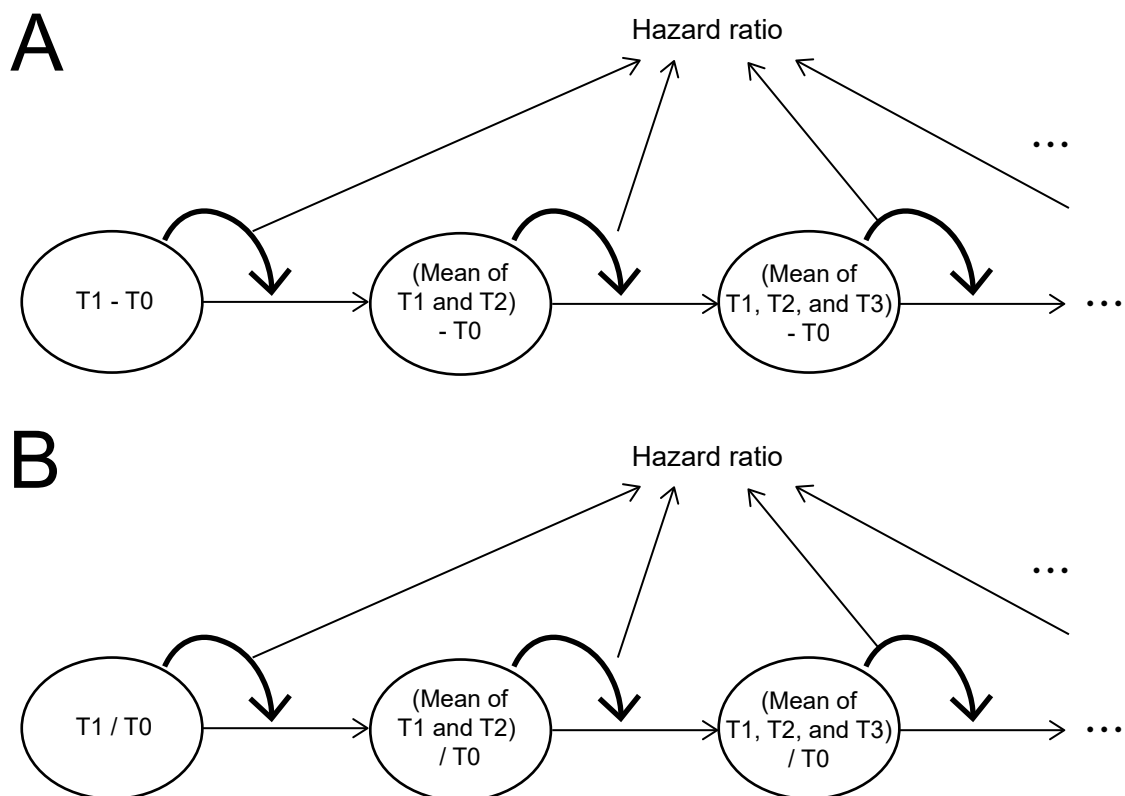

**Figure S2.** Outline of the analysis for (A) difference changes in calcium and phosphate and (B) percent changes in parathyroid hormone. T0, a value at baseline; T1, a value at one year after baseline; T2, a value at two years after baseline; T3, a value at three years after baseline.

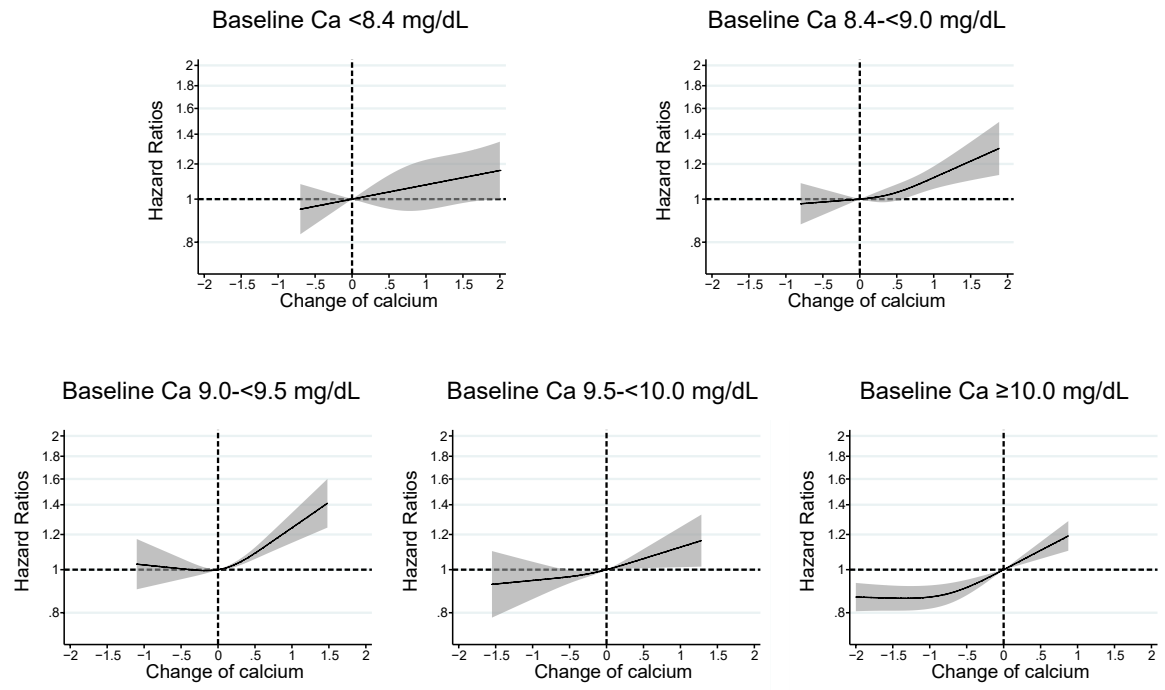

**Figure S3.** Relationship between changes in serum calcium (Ca) levels from baseline values and all-cause mortality.

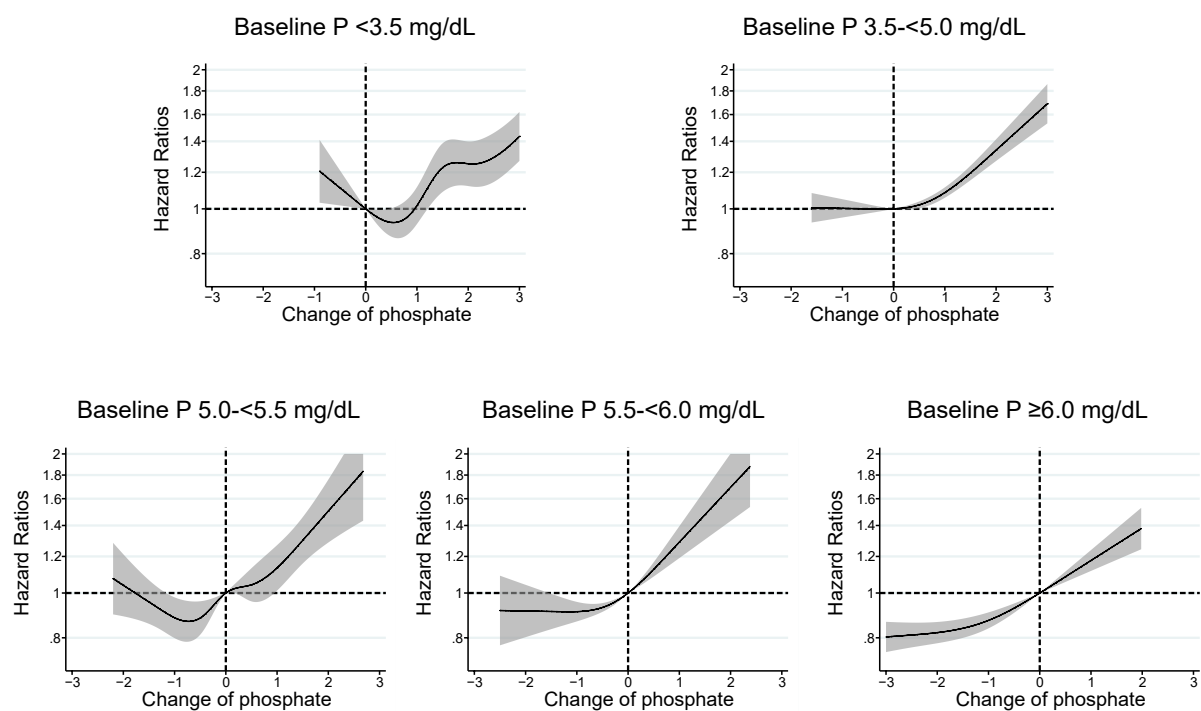

**Figure S4.** Relationship between changes in serum phosphate (P) levels from baseline values and all-cause mortality.

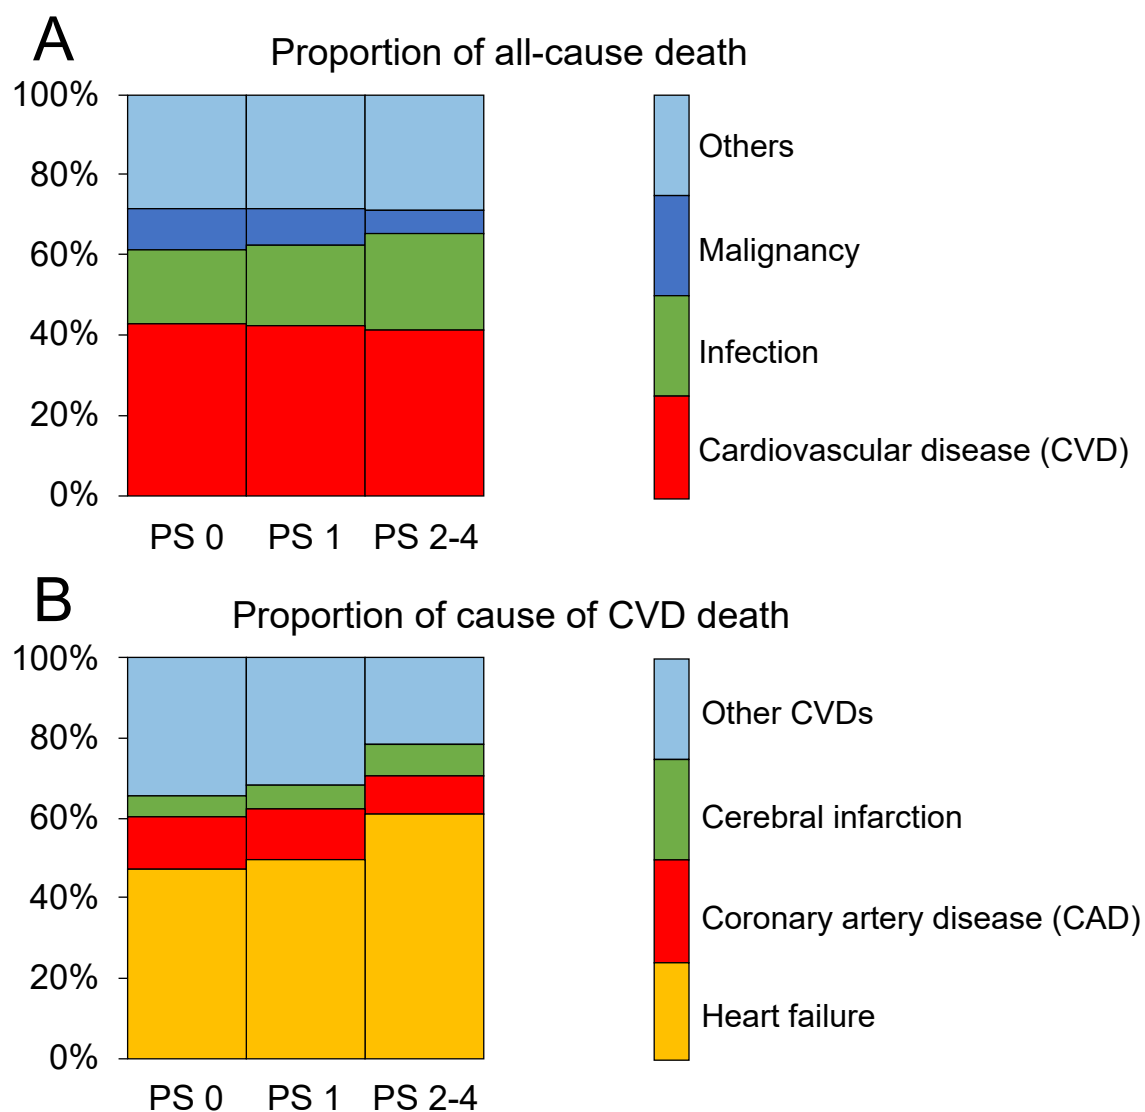

**Figure S5.** Proportion of (A) all-cause death and (B) cardiovascular death in subgroups stratified by performance status (PS).

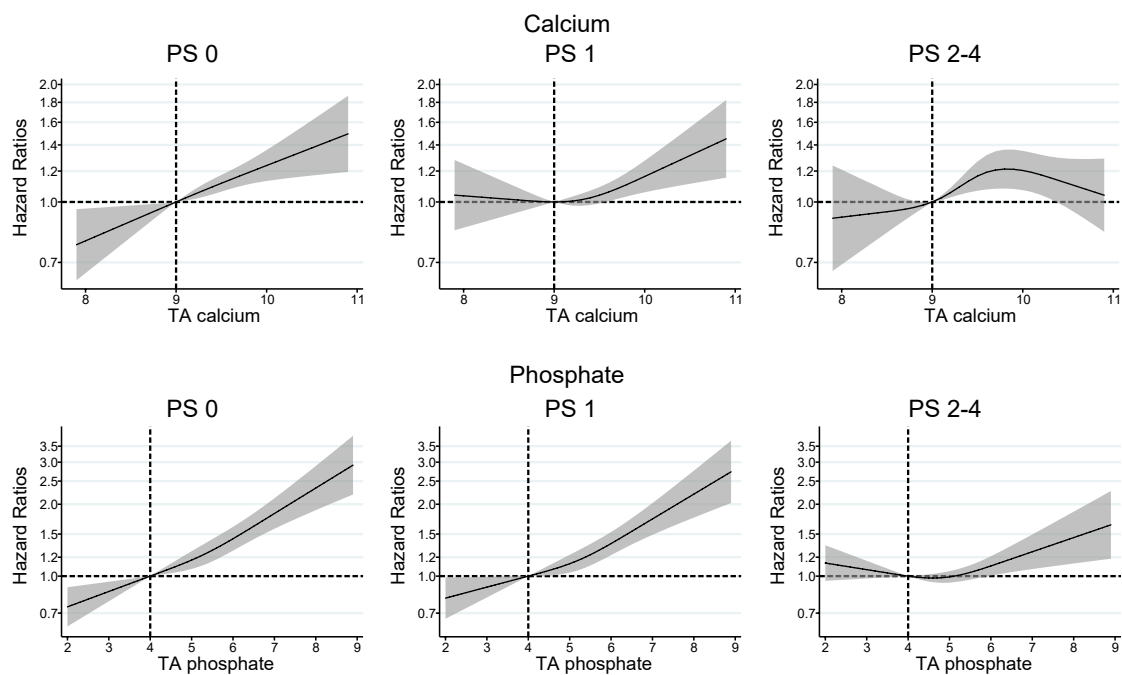

**Figure S6.** Relationship of time-averaged (TA) serum calcium or phosphate levels with mortality due to heart failure in patients stratified by performance status (PS).

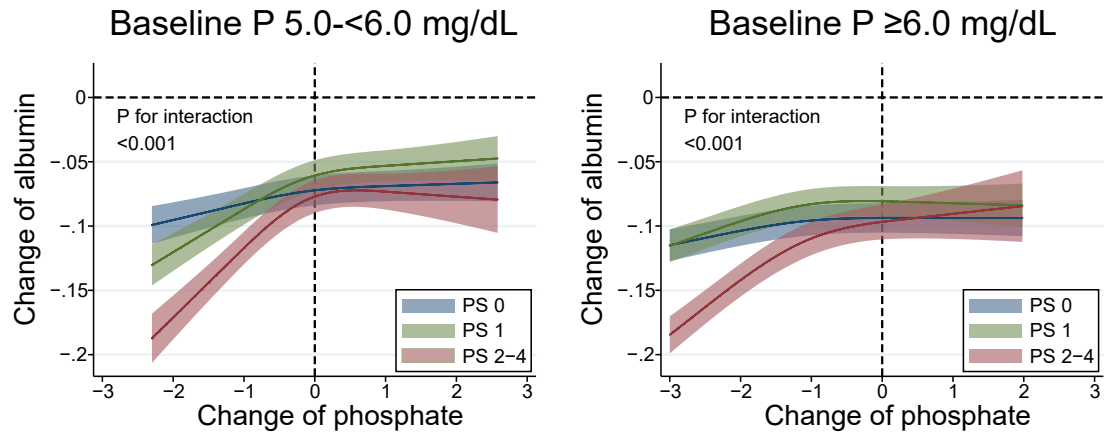

**Figure S7.** Relationship between changes in serum phosphate levels and those in serum albumin levels in patients stratified by performance status (PS).



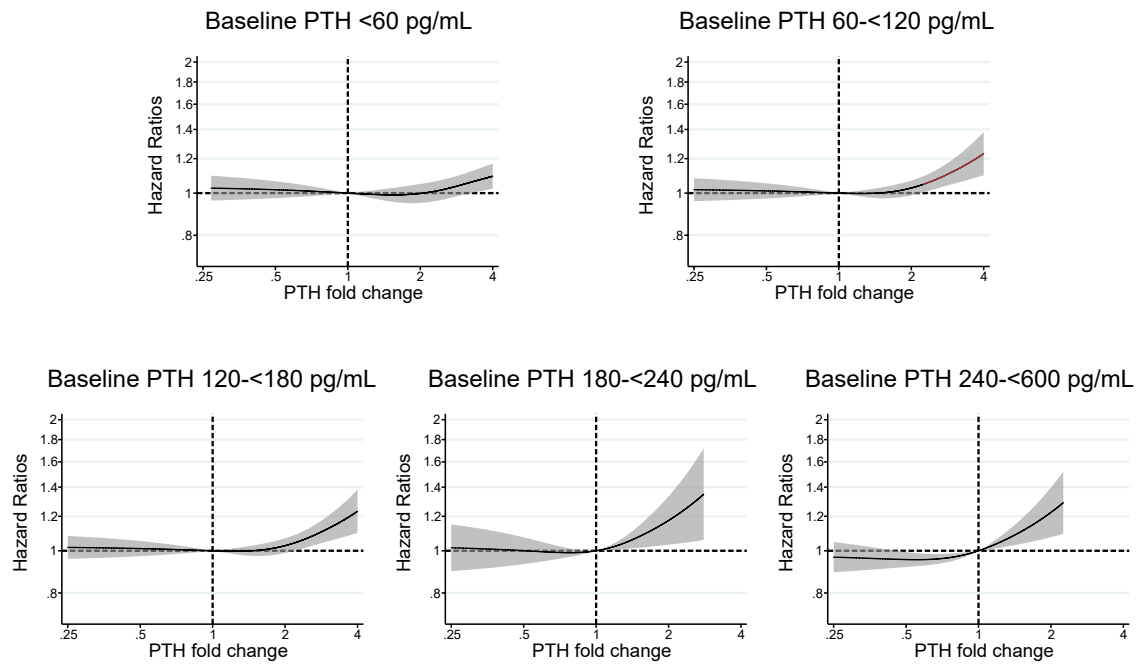

**Figure S8.** Relationship between percent changes in serum intact parathyroid hormone (PTH) levels from baseline values and all-cause mortality.
